# Supplementary material
Source: Springer Nature journal article supplement (http://www.springermedizin.de/resource/supplementary/12872_2012_544_MOESM1_ESM.pdf/9429958)

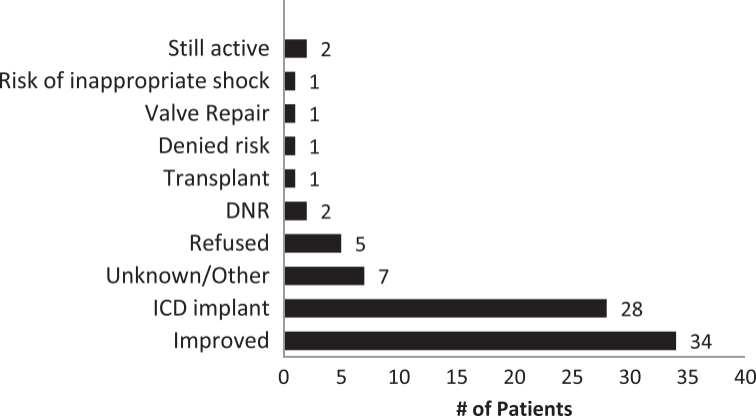

Supplement: MOESM1 [file 9429958]
